# Supplementary material for: Structures and alignment of anisotropic liquid crystal particles in a liquid crystal cell
Source: Royal Society of Chemistry journal article supplement (doi:10.1039/c4ra06221c), 2014-01-01
Supplement: c4ra06221c5.pdf [file c4ra06221c5.pdf]

## Supporting Information

### Structures and Alignment of Anisotropic Liquid Crystal Particles in a Liquid Crystal Cell

Jong-Hyun Lee<sup>1</sup>, Tahseen Kamal<sup>1</sup>, Stephan V. Roth<sup>2</sup>, Peng Zhang<sup>2</sup>, and Soo-Young Park<sup>1\*</sup>

<sup>1</sup>Department of Polymer Science & Engineering, Kyungpook National University,

#1370 Sangyuk-dong, Buk-gu, Daegu 702-701, Korea.

<sup>2</sup>HASYLAB at DESY, Notkestraße 85, D-22603 Hamburg, Germany.

\*Corresponding author e-mail: psy@knu.ac.kr

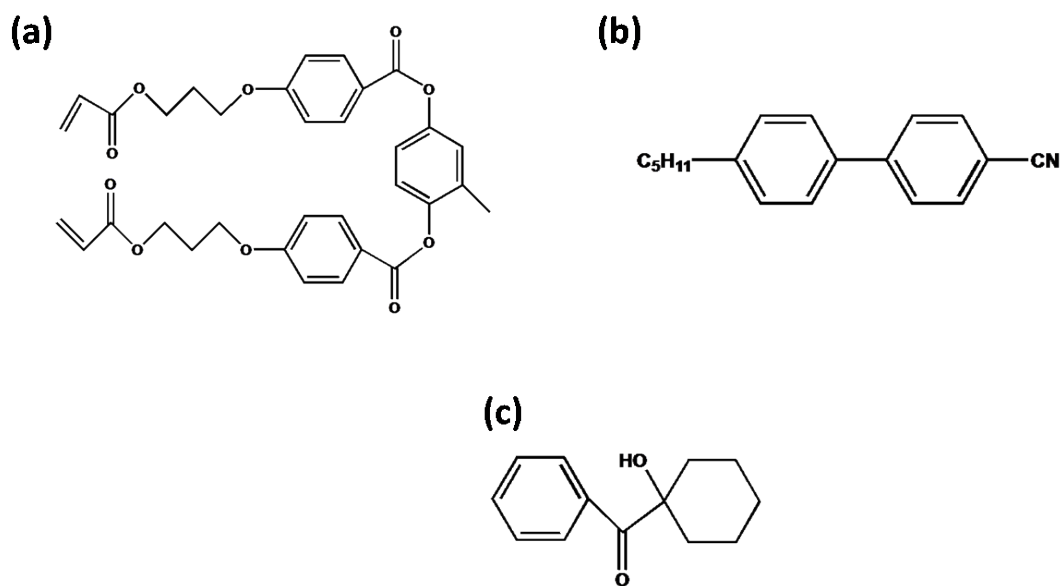

**Figure**

**SI 1.** Chemical structures of (a) RM257; (b) 5CB; and (c) initiator of 1-hydroxycyclohexyl phenyl ketone.

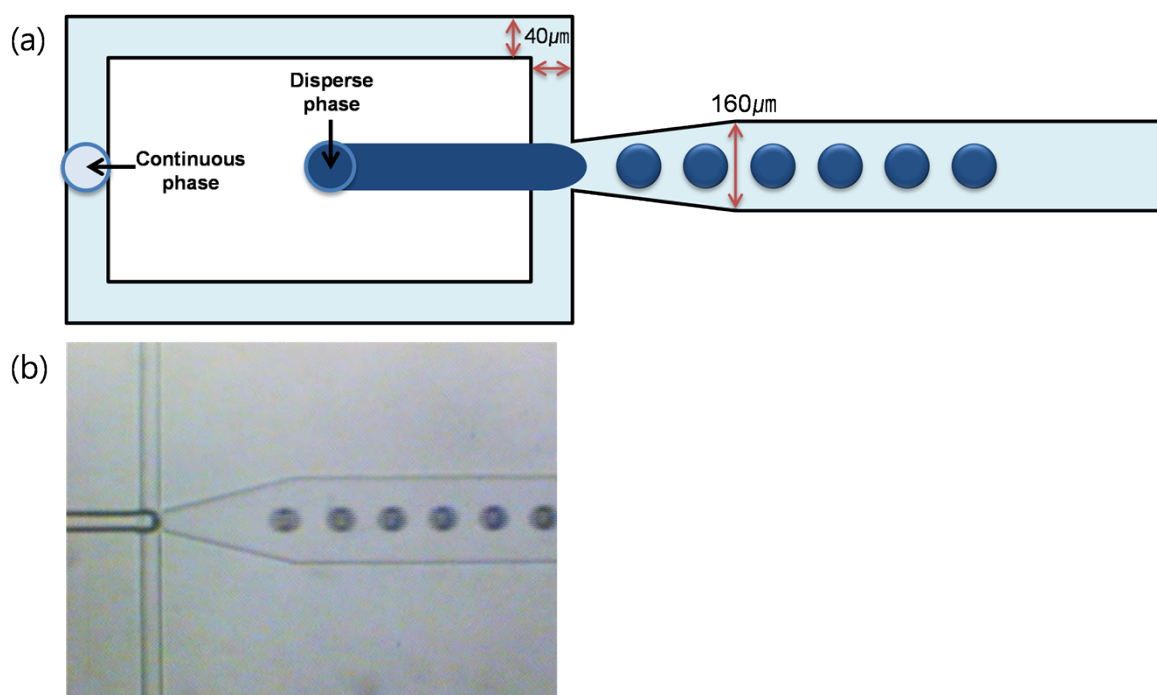

**Figure SI 2.** (a) Schematic of microchip and dimensions of microfluidics channel used in this study, and (b) photographic image.

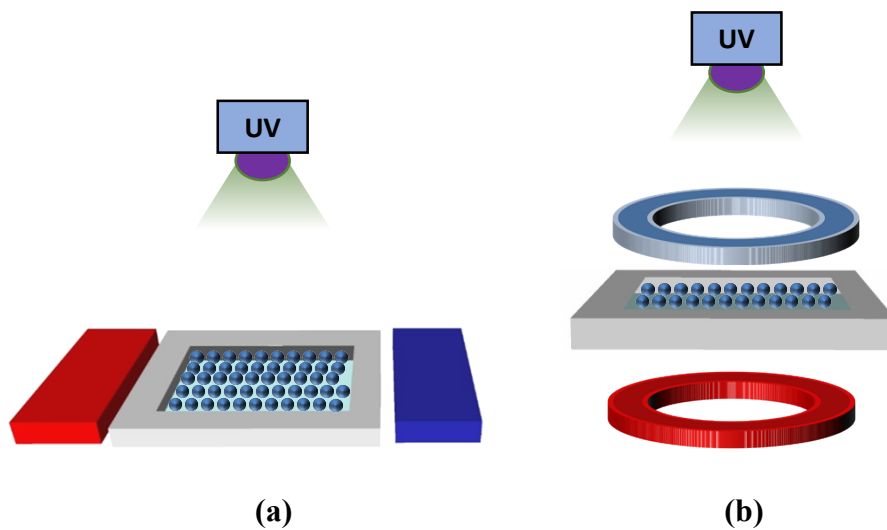

**Figure SI 3.** Set-ups for (a) horizontal; and (b) vertical magnet arrangements.

(a)

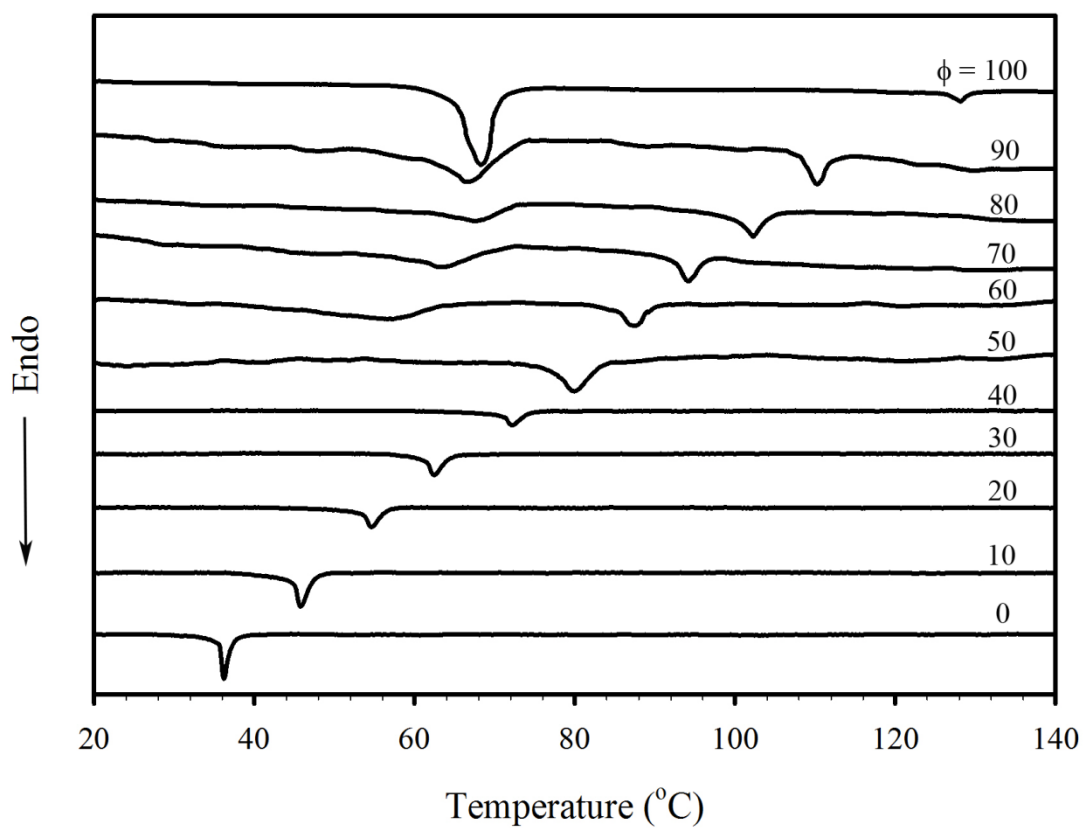

(b)

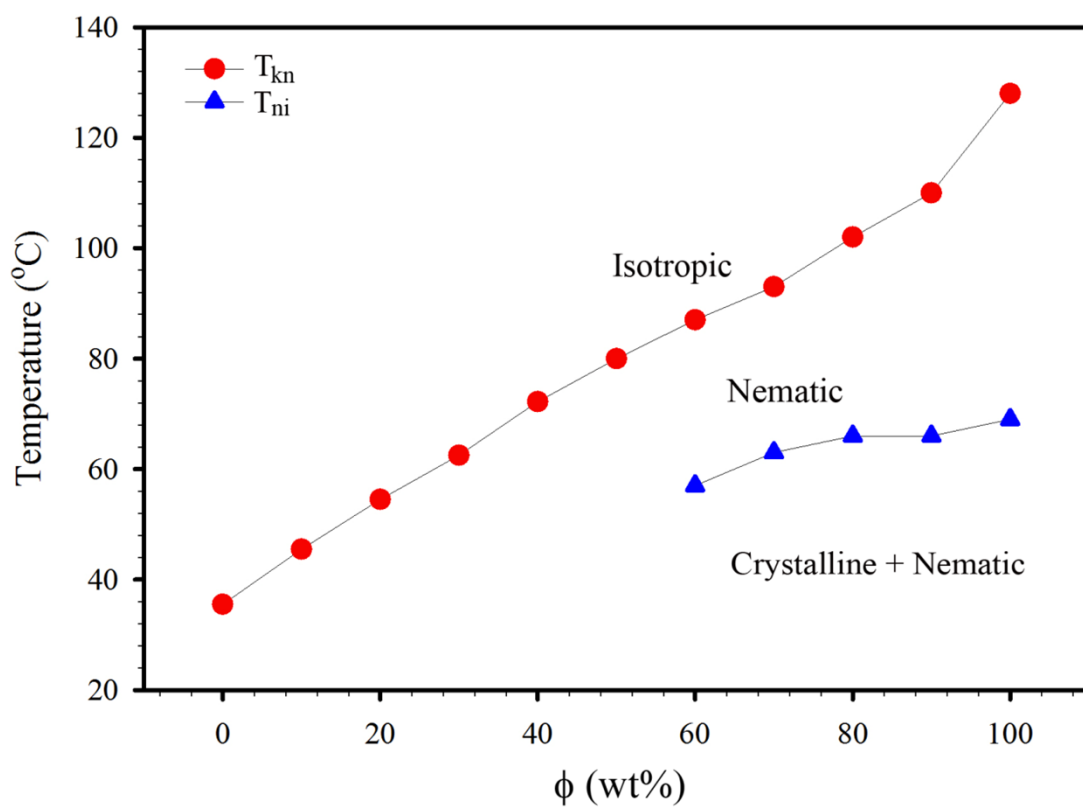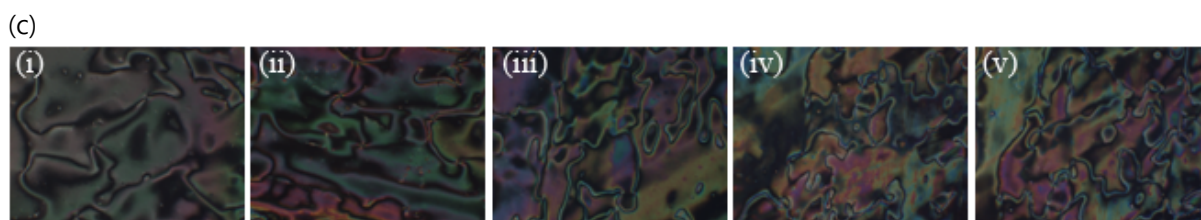

**Figure SI 4.** (a) DSC heating thermograms at  $\phi = 0$ –100 wt%; (b) phase diagram; and (c) POM images at  $\phi =$  (i) 10, (ii) 20, (iii) 30, (iv) 40, and (v) 50 wt% under cross polarizers.

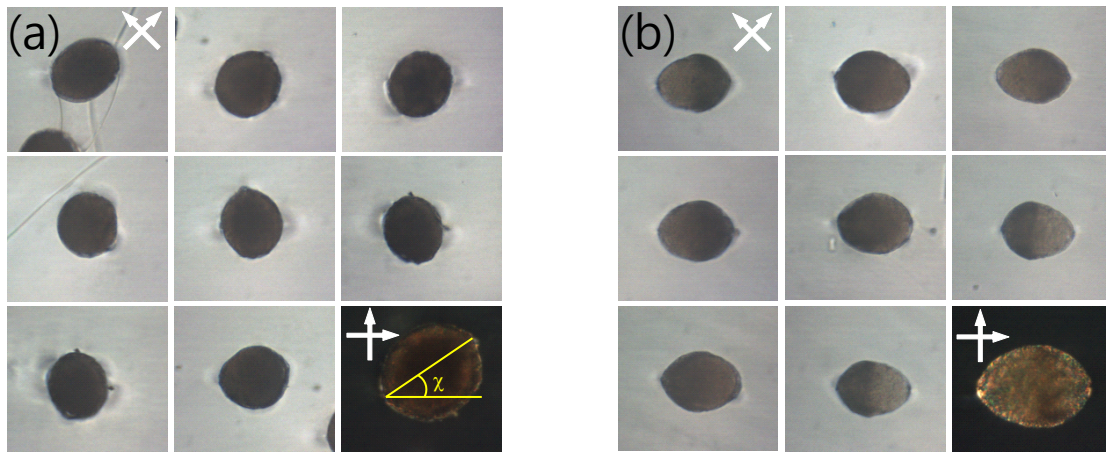

**Figure SI 5.** POM images of selective anisotropic (a)  $LC_{PVA, \text{horizontal}}$ ; and (b)  $LC_{PVA, \text{vertical}}$  particles in an LC cell under crossed polarizers (shown with arrows), which were rotated  $45^\circ$  against the horizontal global orientation of the cell for better visualization on the bright background of the LC cell; the last images in (a) and (b) are before rotation of the crossed polarizers.
